# Supplementary material for: Tailoring Tfh profiles enhances antibody persistence to a clade C HIV-1 vaccine in rhesus macaques
Source: eLife journal article supplement (doi:10.7554/elife.89395), 2023-10-05
Supplement: figures [file elife-89395-figures-v1.pdf]

---

## Figures and figure supplements

Tailoring T<sub>fh</sub> profiles enhances antibody persistence to a clade C HIV-1 vaccine in rhesus macaques

**Anil Verma and Chase E Hawes *et al.***

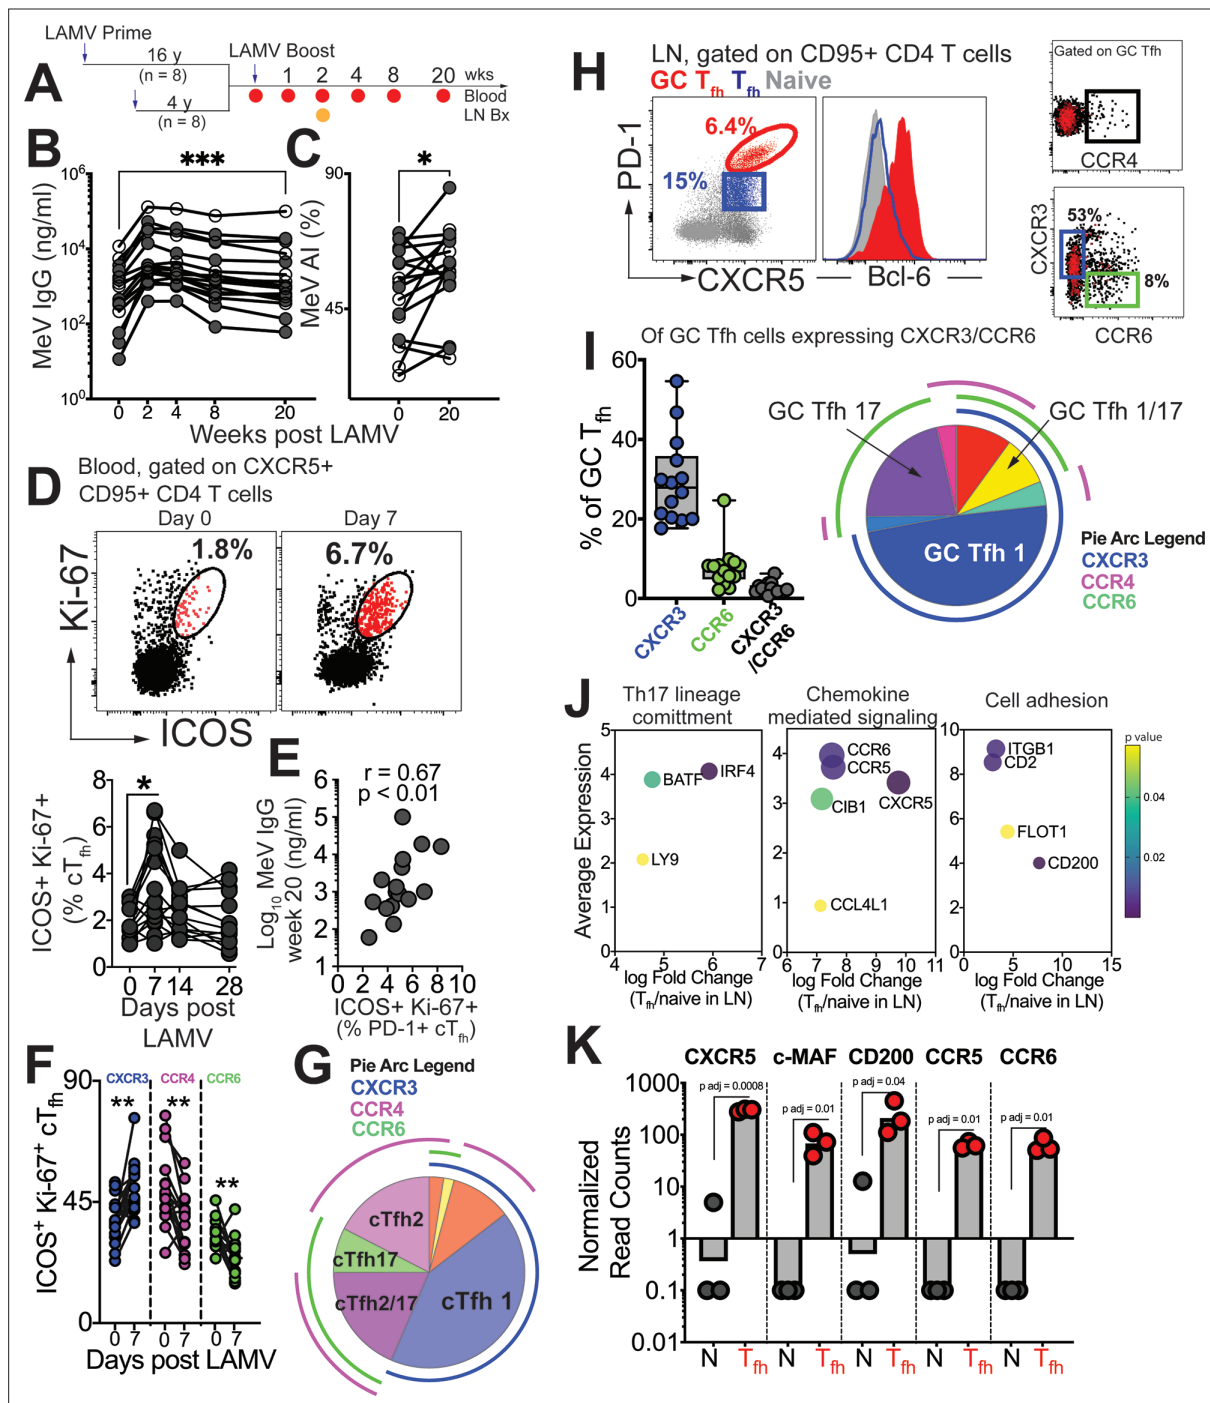

**Figure 1.** GC T<sub>h</sub>1 and GC T<sub>h</sub>17 cells recalled by measles booster. (A) Overview of study design; adult female rhesus macaques immunized with Live Attenuated Measles Virus vaccine (LAMV). (B) Serum MeV IgG kinetics measured by ELISA (filled circles, aged rhesus; open circles, young adults). (C) Avidity index (AI) of MeV IgG measured using chaotropic displacement ELISA with sodium thiocyanate at week 20 and week 0 in serum. (D) Representative flow cytometry plots showing ICOS<sup>+</sup>Ki-67<sup>+</sup> circulating (c)Tfh cells in blood at day 0 and day 7 post LAMV. Kinetics of ICOS<sup>+</sup>Ki-67<sup>+</sup> cTfh cells. (E) Correlation between ICOS<sup>+</sup>Ki-67<sup>+</sup> cTfh cells at day 7 and MeV IgG at week 20. (F) T<sub>h</sub> profile of cTfh cells shows induction of CXCR3<sup>+</sup> cTfh1 at day 7. (G) Boolean analysis (n=16) shows cTfh1 cells induced 1 week post LAMV. Overlapping pie arcs denote cTfh cells expressing multiple chemokine receptors as denoted by arc color. (H) Representative flow cytometry plots show CXCR5<sup>+</sup> PD-1<sup>++</sup> GC T<sub>h</sub> cells and histogram shows Bcl-6 expression on GC T<sub>h</sub> cells. T<sub>h</sub> profile of GC T<sub>h</sub> cells shows expression of CXCR3 and CCR6. (I) Boolean analysis of GC T<sub>h</sub> cells expressing either CXCR3 or CCR6 (n=14) shows proportion of T<sub>h</sub>1, T<sub>h</sub>17 and T<sub>h</sub>1/17 GC T<sub>h</sub> subsets. (J) Bubble plots show genes for significantly enriched pathways related to T helper differentiation on sorted CXCR5<sup>+</sup> PD-1<sup>++</sup> cells. (K) Gene expression on sorted CXCR5<sup>+</sup> PD-1<sup>++</sup> cells. Statistical analysis was performed using two-tailed Wilcoxon matched-pairs signed rank test (in panels B-D, F) or spearman rank correlation test (E); \* p<0.05, \*\*p<0.01, \*\*\* p<0.001, \*\*\*\* p<0.0001.

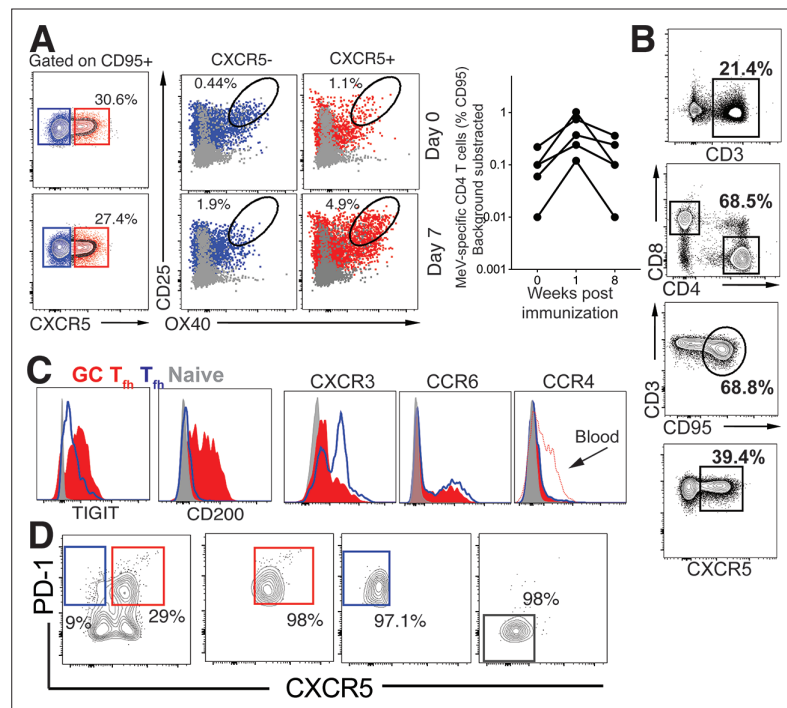

**Figure 1—figure supplement 1.** MeV specific T<sub>fh</sub> cells. **(A)** Gating strategy to identify CXCR5<sup>+</sup> OX40<sup>+</sup> CD25<sup>+</sup> MeV-specific T<sub>fh</sub> cells within PBMCs following stimulation with MeV antigen at Day 0 and Day 7 post LAMV. Right panel illustrates the MeV specific responses in CD4 T cells (%CD95) at weeks 0, 1, and 8 following immunization. **(B)** Flow plots illustrate gating strategy to identify cT<sub>fh</sub> cells. **(C)** Representative histograms show expression of TIGIT, CD200, CXCR3, CCR6, and CCR4 on GC T<sub>fh</sub> cells in LN. **(D)** Sorting schematic to isolate CXCR5 + PD-1<sup>+/++</sup> cells for RNA sequencing.

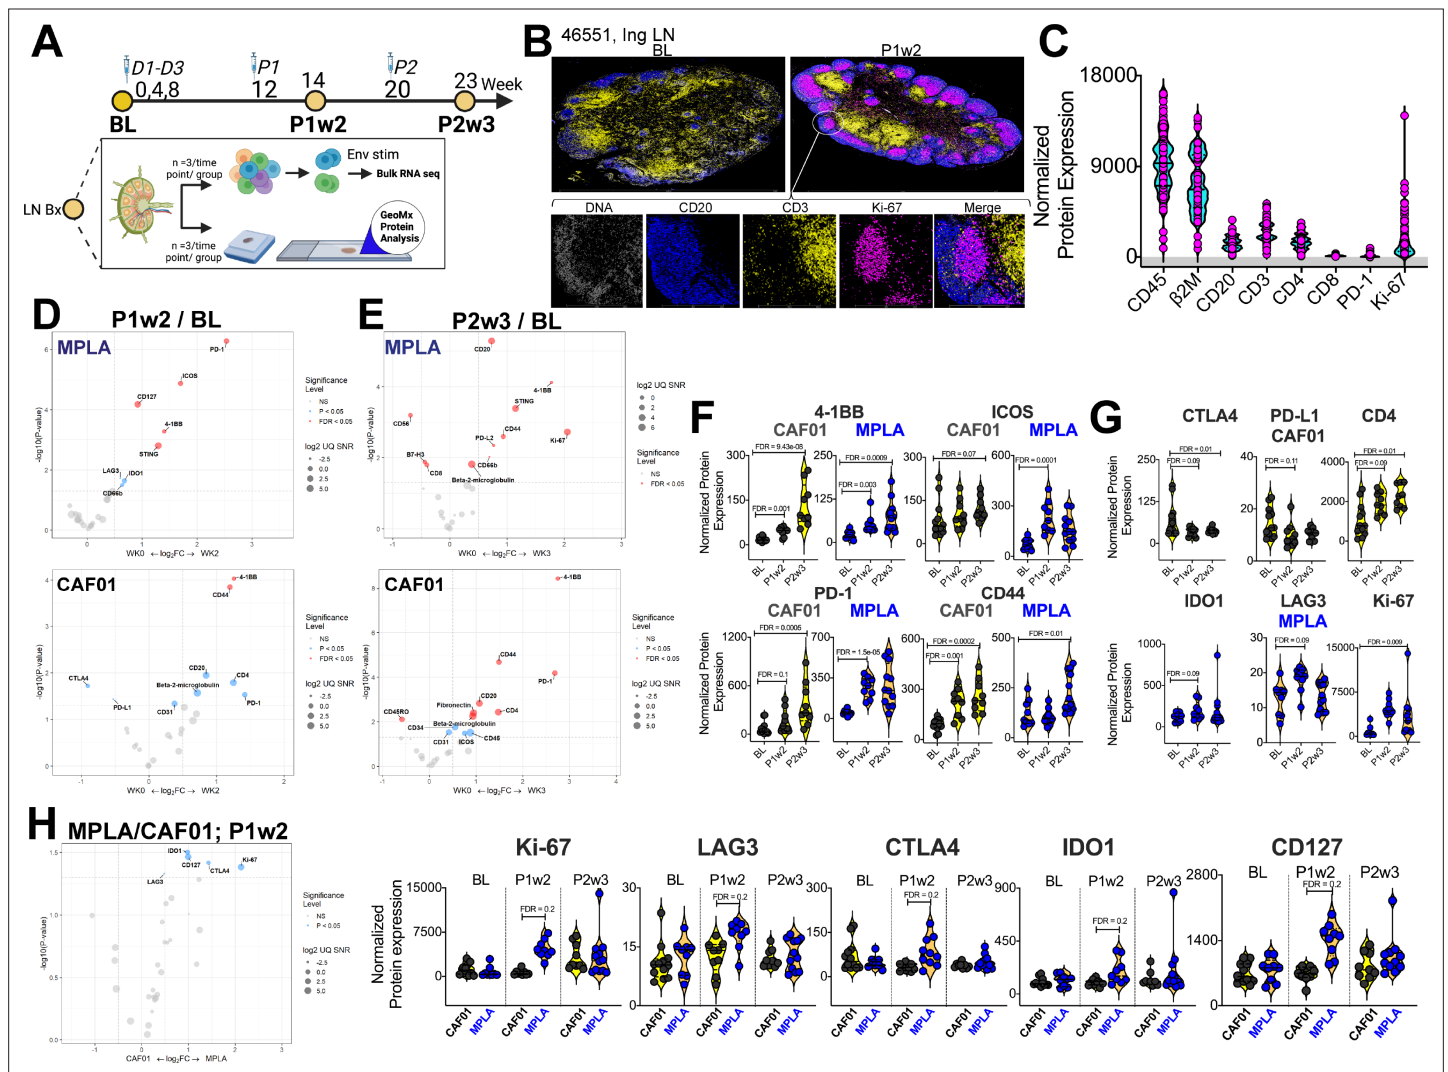

**Figure 2.** Induction of Robust T Cell Activation in GCs with HIV-1 Env Formulated in CAF01 and MPLA +QS-21 Adjuvants. **(A)** Overview of experimental design for in-situ proteomics and transcriptional analysis. **(B)** Representative images of GC from FFPE sections of inguinal LN at baseline and week 2 post protein 1 immunization with HIV-Env gp140 | MPLA +QS-21; scale bar; top, 3 mm, close up, 300  $\mu$ m. LN sections were stained for CD20 (blue), CD3 (yellow), Ki-67 (magenta), and DNA (gray) to identify GCs. Circular ROIs (100  $\mu$ m in diameter, total 60) were selected based on co-localization of CD3 with CD20 +Ki-67+GC B cells for proteomic profiling with a 32-plex antibody cocktail. Normalized protein expression (NPE) values were calculated using three negative control IgG probes. **(C)** NPE of key lineage markers across all ROIs at BL, P1w2, and P2w3. **(D-E)** Volcano plots show proteins induced post boost in each vaccine group. **(F)** Violin plots show common proteins induced post protein boost in MPLA and CAF01 groups. **(G)** Violin plots of proteins induced with CAF01 and MPLA. **(H)** Volcano plot (left) and Violin plots (right) of proteins significantly different across HIV-1 Env gp140 MPLA +QS-21 and CAF01 regimens. Differential expression was modeled using a linear mixed-effect model to account for the sampling of multiple ROI/AOI segments per patient/tissue. Criterion of significance was nominal p-value  $< 0.05$ , plots show False discovery rate (FDR).



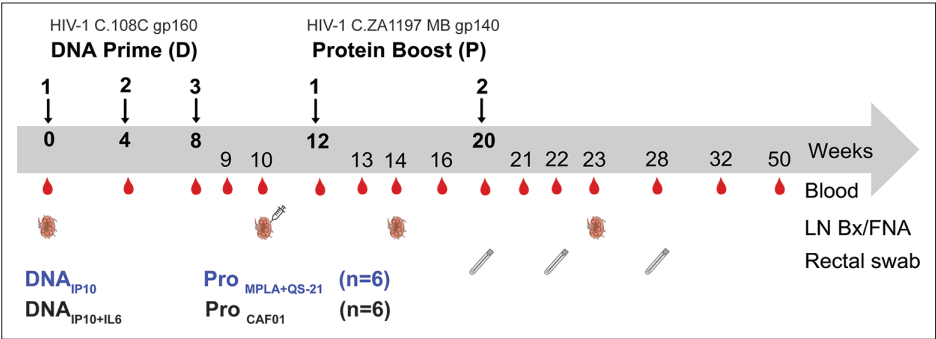

**Figure 2—figure supplement 1.** Experimental design of DNA-prime/Protein-boost Clade C HIV-1 immunization.

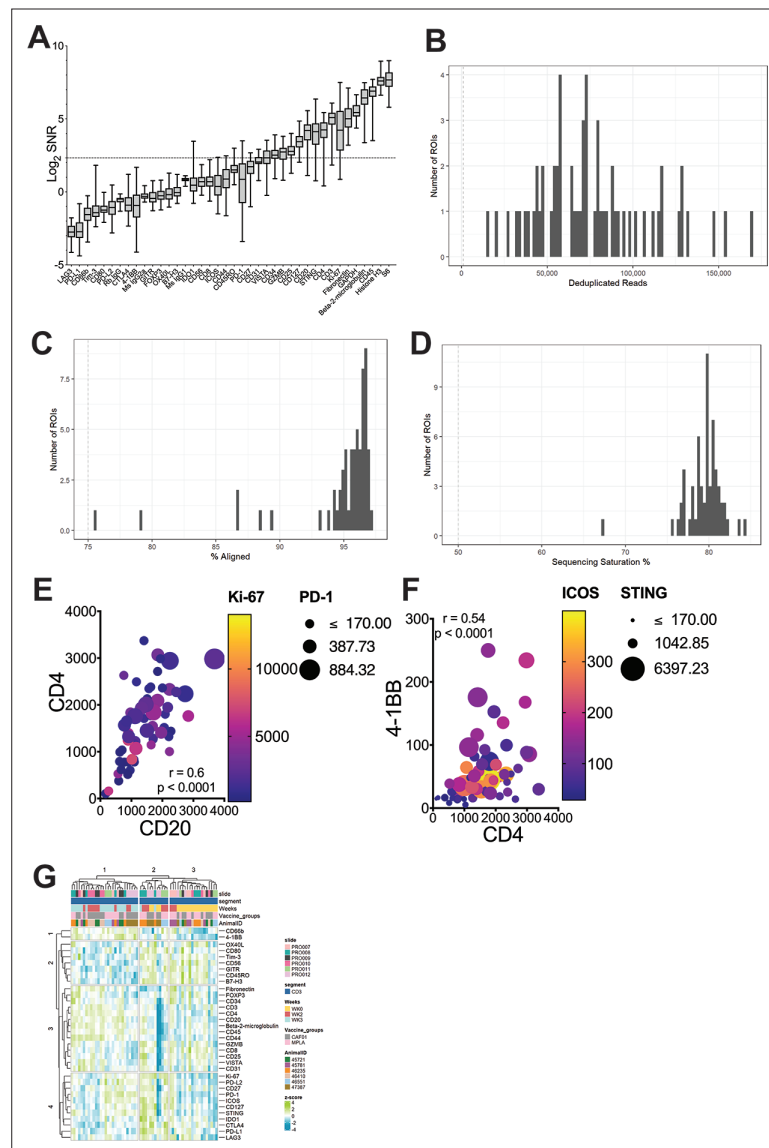

**Figure 2—figure supplement 2.** Sequencing QC histograms show (A) Signal-to-noise ratio computed by dividing raw count values by the geometric mean of the negative IgG probes. Quality control metrics- (B) deduplicated reads, (C) percent aligned reads, (D) sequencing saturation. (E) Bubble plot shows correlation of CD20 protein expression with CD4; bubble size corresponds to PD-1 expression, color intensity, Ki-67 expression; Spearman value, two-tailed p value of 60 pairs. (F) Bubble plot shows correlation of CD4 protein expression with 4-1BB; bubble size corresponds to ICOS expression, color intensity, STING expression; Spearman value, two-tailed p value of 60 pairs. (G) Heatmap plots show unsupervised hierarchical clustering of z-score values for each protein across time for each animal.

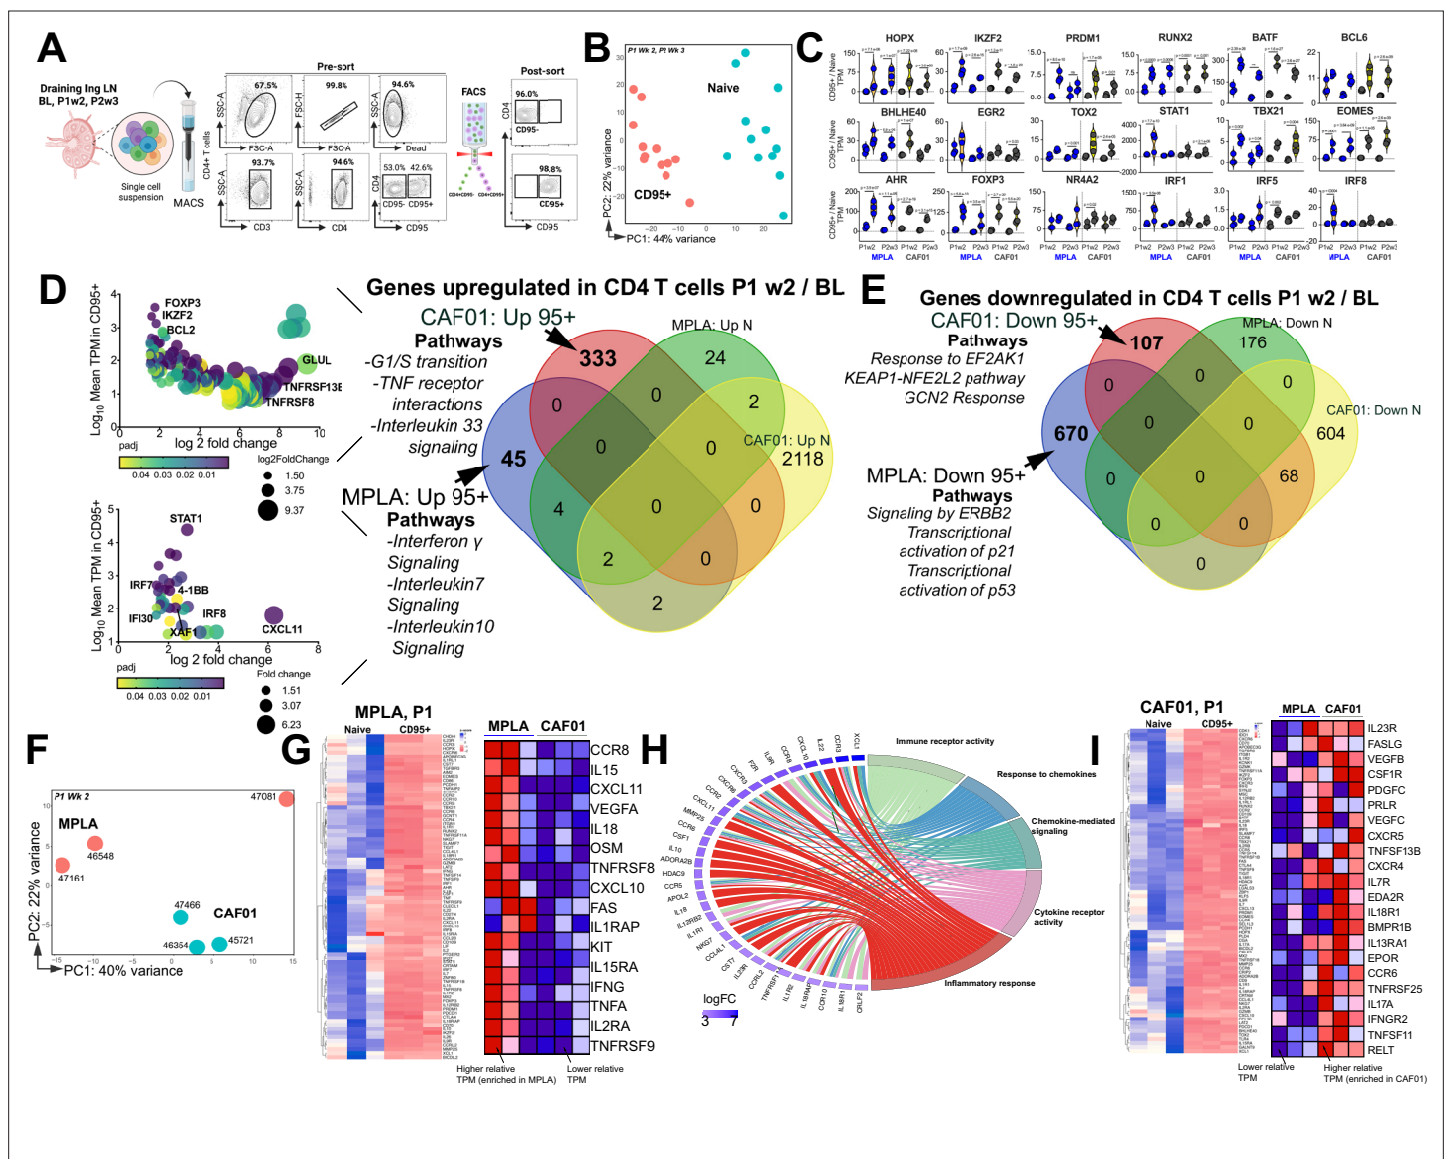

**Figure 3.** T<sub>H</sub>1 molecular programs potentiated by HIV-1 Env/MPLA + QS-21. **(A)** FACS purified CD95<sup>-</sup> (naive [N]) and CD95<sup>+</sup> CD4 T cells, stimulated overnight with HIV-1 Env, were sequenced to assess transcriptional programs. **(B)** Principal component analysis (PCA) of all expressed genes shows distinct clustering of N and CD95<sup>+</sup> cells. **(C)** Violin plots show transcripts per million (TPM) values of differentially expressed transcription factors (p adj < 0.05) in CD95<sup>+</sup> CD4 T cells relative to naive CD4 T cells post vaccination. **(D)** Bubble plots depict DEG at P1w2 versus BL in CD95<sup>+</sup> CD4 T cells in CAF01 (top) and MPLA (bottom). Venn Diagram of DEG genes upregulated in CD95<sup>+</sup> and naive subsets at P1w2 relative to BL shows 45 and 333 genes exclusively upregulated in CD95<sup>+</sup> CD4 T cells with MPLA and CAF01, respectively. **(E)** Venn diagram of significantly downregulated genes. **(F)** PCA of all expressed genes shows distinct clustering across vaccine groups at P1w2. **(G)** Heat maps depict log<sub>2</sub> gene expression (transcripts per million (TPM)) for highly DEG in CD95<sup>+</sup> cells compared to naive cells at P1w2 in MPLA; heat map in inset depicts TPM of genes represented in Cytokine-cytokine receptor interaction pathways across vaccine regimens. **(H)** Chord plot shows GO Terms enriched with corresponding upregulated genes in CD95<sup>+</sup> CD4 T cells at P1w2 with MPLA. **(I)** Heat maps depict log<sub>2</sub> gene expression (TPM) for highly DEG in CD95<sup>+</sup> cells compared to naive cells at P1w2 in CAF01; heat map in inset depicts TPM of genes represented in Cytokine-cytokine receptor interaction pathway across vaccine regimens.

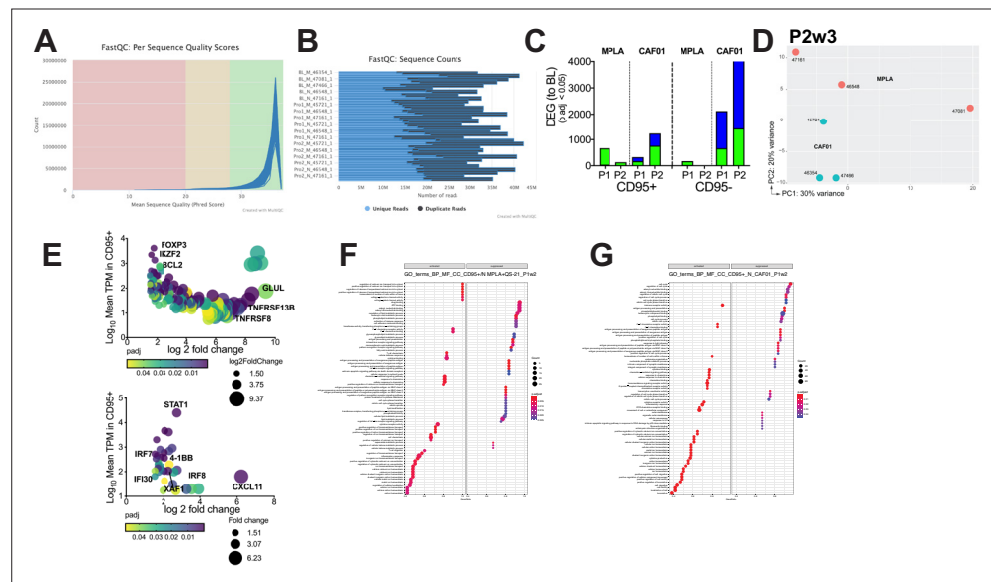

**Figure 3—figure supplement 1.** QC Metrics of RNA sequencing. (A–B) QC metrics (C) Bar graph shows DEG genes within CD4 subsets post vaccination relative to baseline. (D) PCA plot of CD95 +CD4 T cell subsets at P2w3 (E) Bubble plots show DEG enriched in CD95 +subsets at P1w2 in CAF01 and MPLA. GO-Terms of biological pathways differential induced in MPLA (F) and CAF01 (G) in CD95 +CD4 T cells at P1w2.

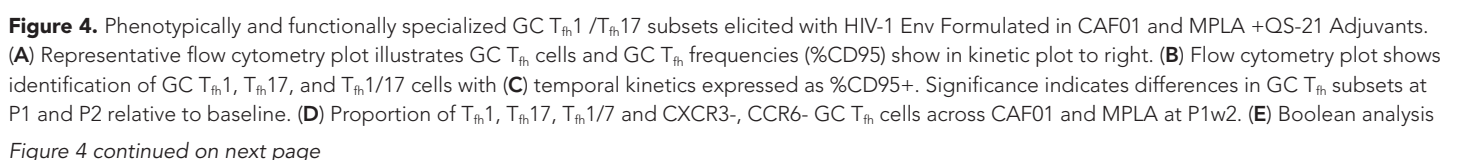

## Figure 4 continued

(n=6 each group) shows proportion of  $T_{h1}$ ,  $T_{h17}$  and  $T_{h1/17}$  GC  $T_{fh}$  subsets. **(F–G)** Intracellular cytokine staining (ICS) analysis of  $T_{h1}$ ,  $T_{h17}$ ,  $T_{h1/17}$  subsets at P1w2. **(H)** Gating strategy (left) and frequencies (right) of circulating  $T_{fh}$  ( $cT_{fh}$ ) and  $cT_{fh1}$  cells in whole blood at P1w0 and P1w1. **(I)** Gating strategy (left) and frequencies (right) of activated ( $CD40L^{+}OX40^{+}$ )  $cT_{fh}$  ( $CXCR5^{+}$ ) and non- $cT_{fh}$  CD4 T cells ( $CXCR5^{-}$ ) cells in PBMCs at P1w1. **(J)** ICS of  $cT_{fh}$  and non- $cT_{fh}$  CD4 T cells following Env stimulation at P1w1 and P2w1. Data points show individual animals. Statistical analysis was performed using two-tailed Wilcoxon matched-pairs signed rank test (in panels **A**, **C**, **H**) or Mann-Whitney U test (in panels **D**; **G**, **I–K**); \*  $p < 0.05$ , \*\* $p < 0.01$ .



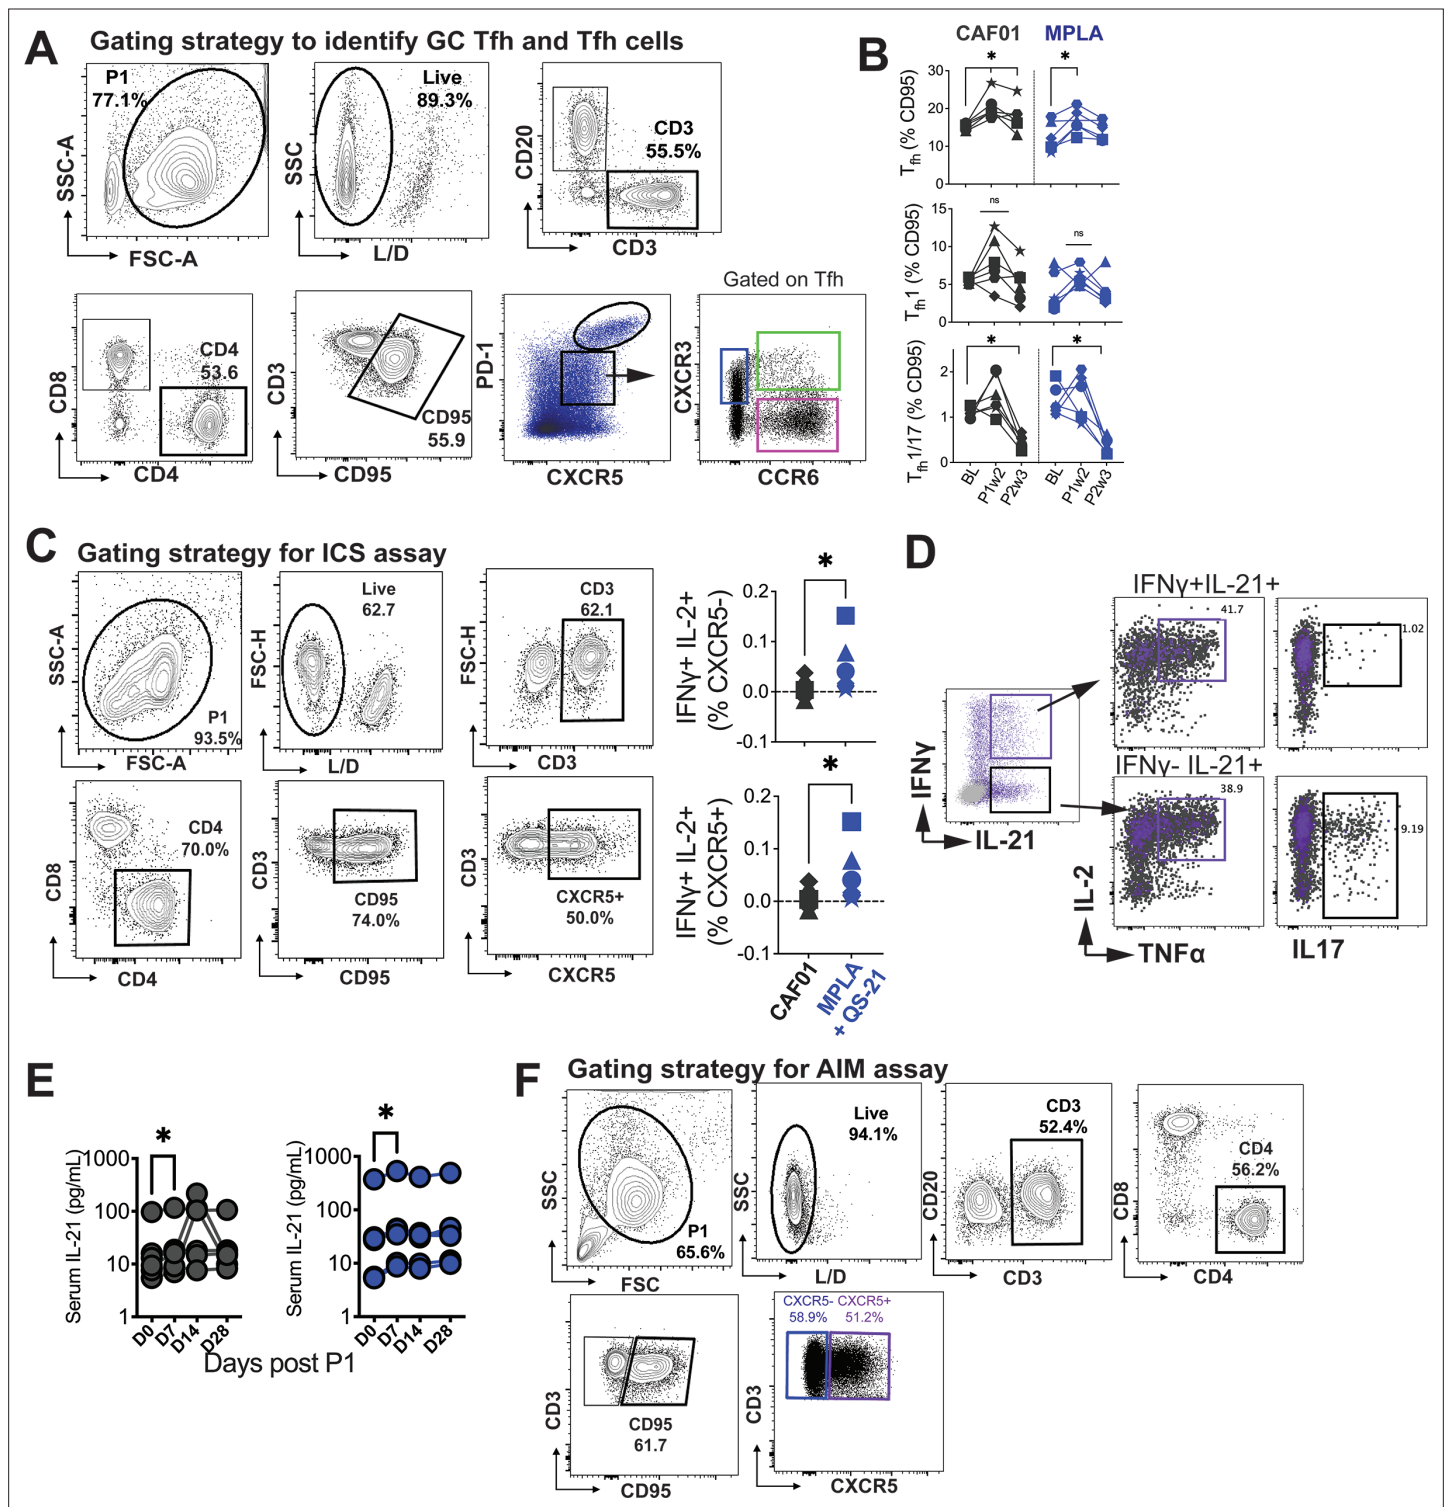

**Figure 4—figure supplement 1.** Gating strategy to identify GC T<sub>fh</sub> and T<sub>fh</sub> cells in lymph nodes. (A) Illustrates gating strategy to identify GC T<sub>fh</sub> cells. (B) Frequencies of T<sub>fh</sub> cells (CD4<sup>+</sup>CD95<sup>+</sup>PD-1<sup>+</sup>CXCR5<sup>+</sup>) (Top), T<sub>fh</sub>1 cells (CD4<sup>+</sup>CD95<sup>+</sup>PD-1<sup>+</sup>CXCR5<sup>+</sup>CXCR3<sup>+</sup>) (Middle), and T<sub>fh</sub>1/17 cells (CD4<sup>+</sup>CD95<sup>+</sup>PD-1<sup>+</sup>CXCR5<sup>+</sup>CXCR3<sup>+</sup>CCR6<sup>+</sup>) in lymph nodes. (C) Intracellular cytokine staining (ICS) to identify Env-specific T<sub>fh</sub> cells. (D) Co-expression of IL-2 and TNFα in IFNγ<sup>+</sup> versus IFNγ<sup>-</sup> subsets producing IL-21. (E) Serum IL-21 post P1. (F) Gating of AIM assay.

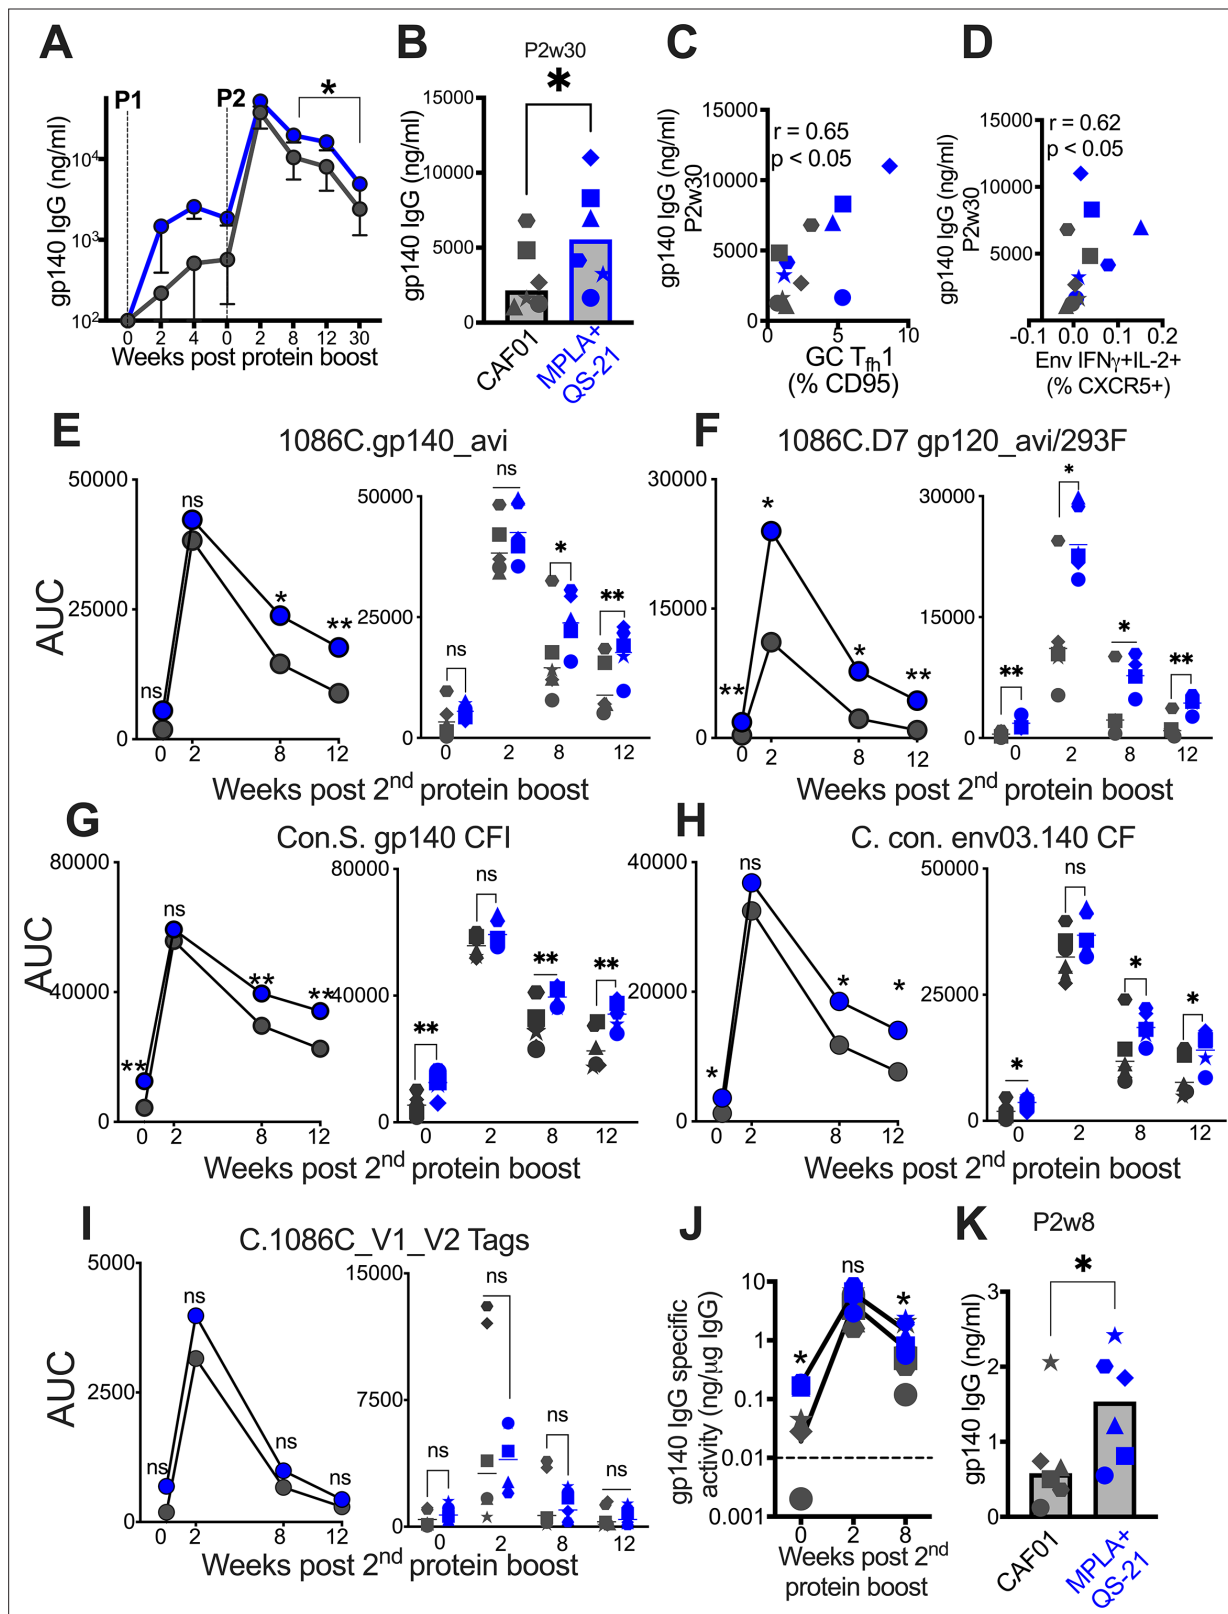

**Figure 5.** Induction of persistent anti-Env IgG antibodies with HIV-1 Env/MPLA + QS-21. (A) Kinetics of HIV-1 Env IgG post protein boost (P1 and P2) across vaccine regimens measured by ELISA against C. 1086 gp140. (B) Serum gp140 IgG week 30 post P2w3. (C) GC  $T_{H1}$  cells correlate with gp140 IgG at week 30. (D) Env-specific (IFN $\gamma$ +IL-2 $^{+}$ )  $T_{H1}$  cells correlate with gp140 IgG at week 30. (E–I) Area under the curve (AUC) values of IgG temporally shown by antigens, as indicated. (J) Temporal and (K) week 8 measures of gp140-specific IgG levels relative to total IgG in rectal secretions. Data points

Figure 5 continued on next page

Figure 5 continued

show individual animals. Statistical analysis was performed using Mann-Whitney U test (in panels **A-B**, **E-K**), or two-tailed Spearman rank correlation test (**C-D**); \*  $p < 0.05$ , \*\* $p < 0.01$ .

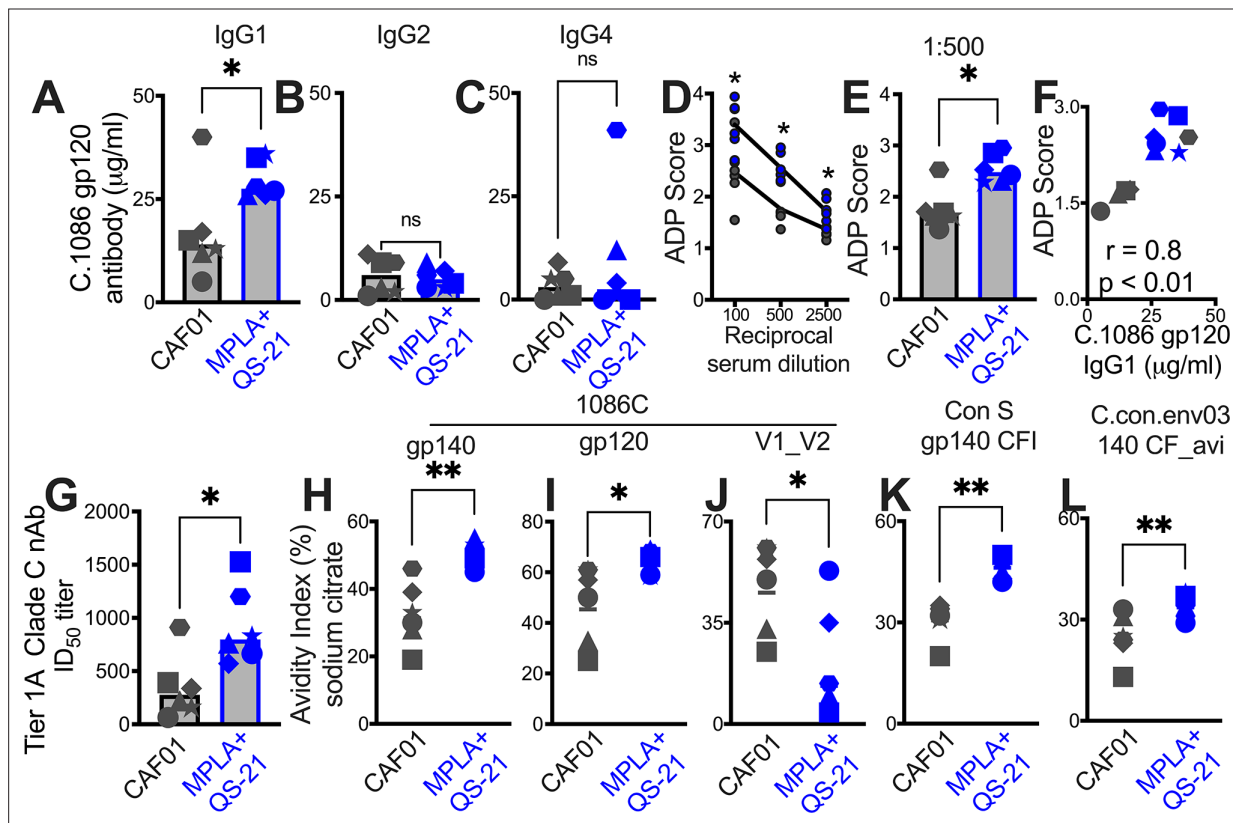

**Figure 6.** Induction of IgG1 subclass antibodies with greater effector functions with HIV-1 Env/MPLA +QS-21. Serum C. 1086 gp120-specific (A) IgG1, (B) IgG2 (C) IgG4 antibodies at P2w2. (D–E) Antibody-dependent phagocytosis (ADP) score at P2w8. (F) C. 1086 gp120-specific IgG1 correlates with ADP score. (G) Infectious dose 50% (ID<sub>50</sub>) titers to Tier 1 A Clade C MW965.26 HIV-1 isolate at P2w2. (H–L) Avidity index (with sodium citrate) across vaccine regimens against specific antigens at P2w8. Data points show individual animals. Statistical analysis was performed using two-tailed Mann-Whitney U test (in panels A–E; G–L), or two-tailed Spearman rank correlation test (F); \* p<0.05, \*\*p<0.01.

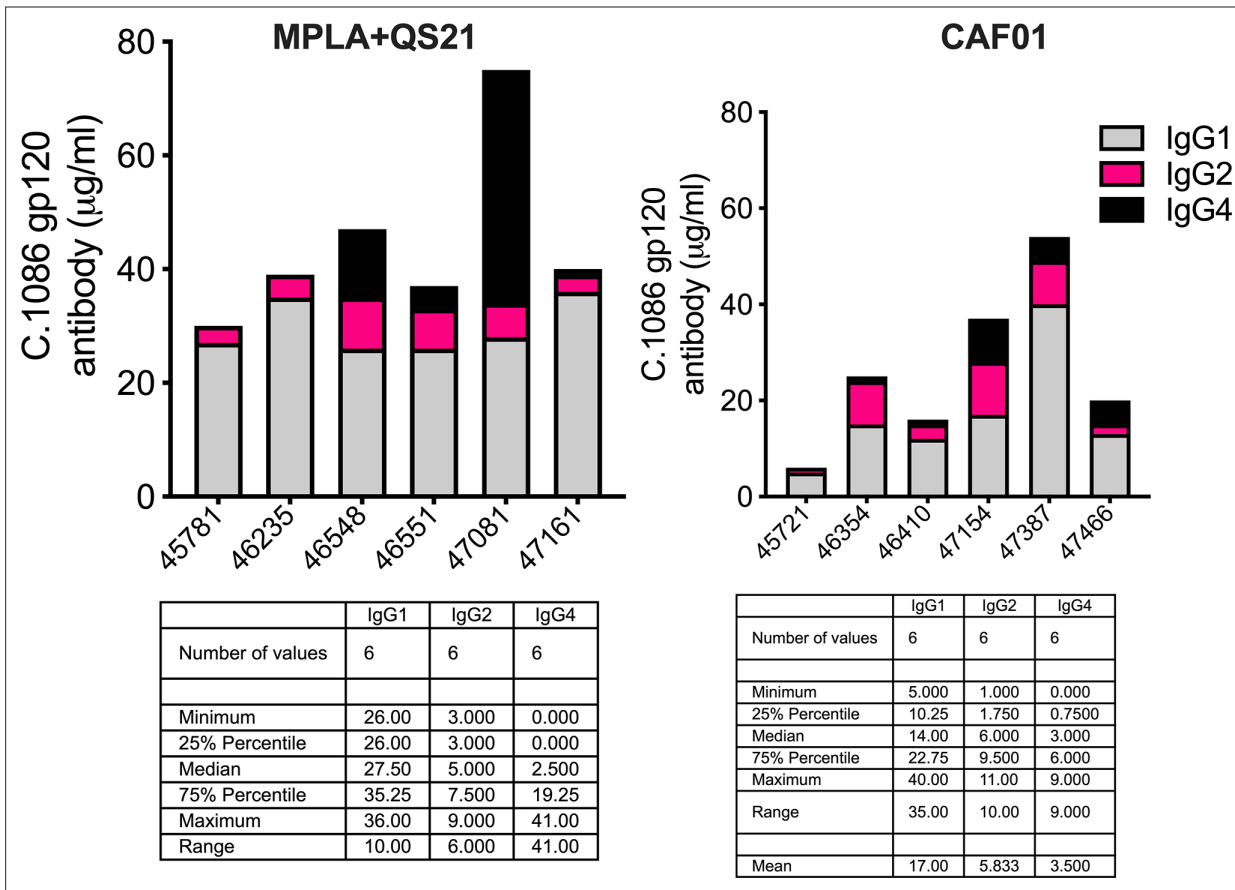

**Figure 6—figure supplement 1.** Serum C. 1086 gp120-specific IgG1 (grey), IgG2 (pink), and IgG4 (black) in animals (x-axis – animal IDs) P2w3.

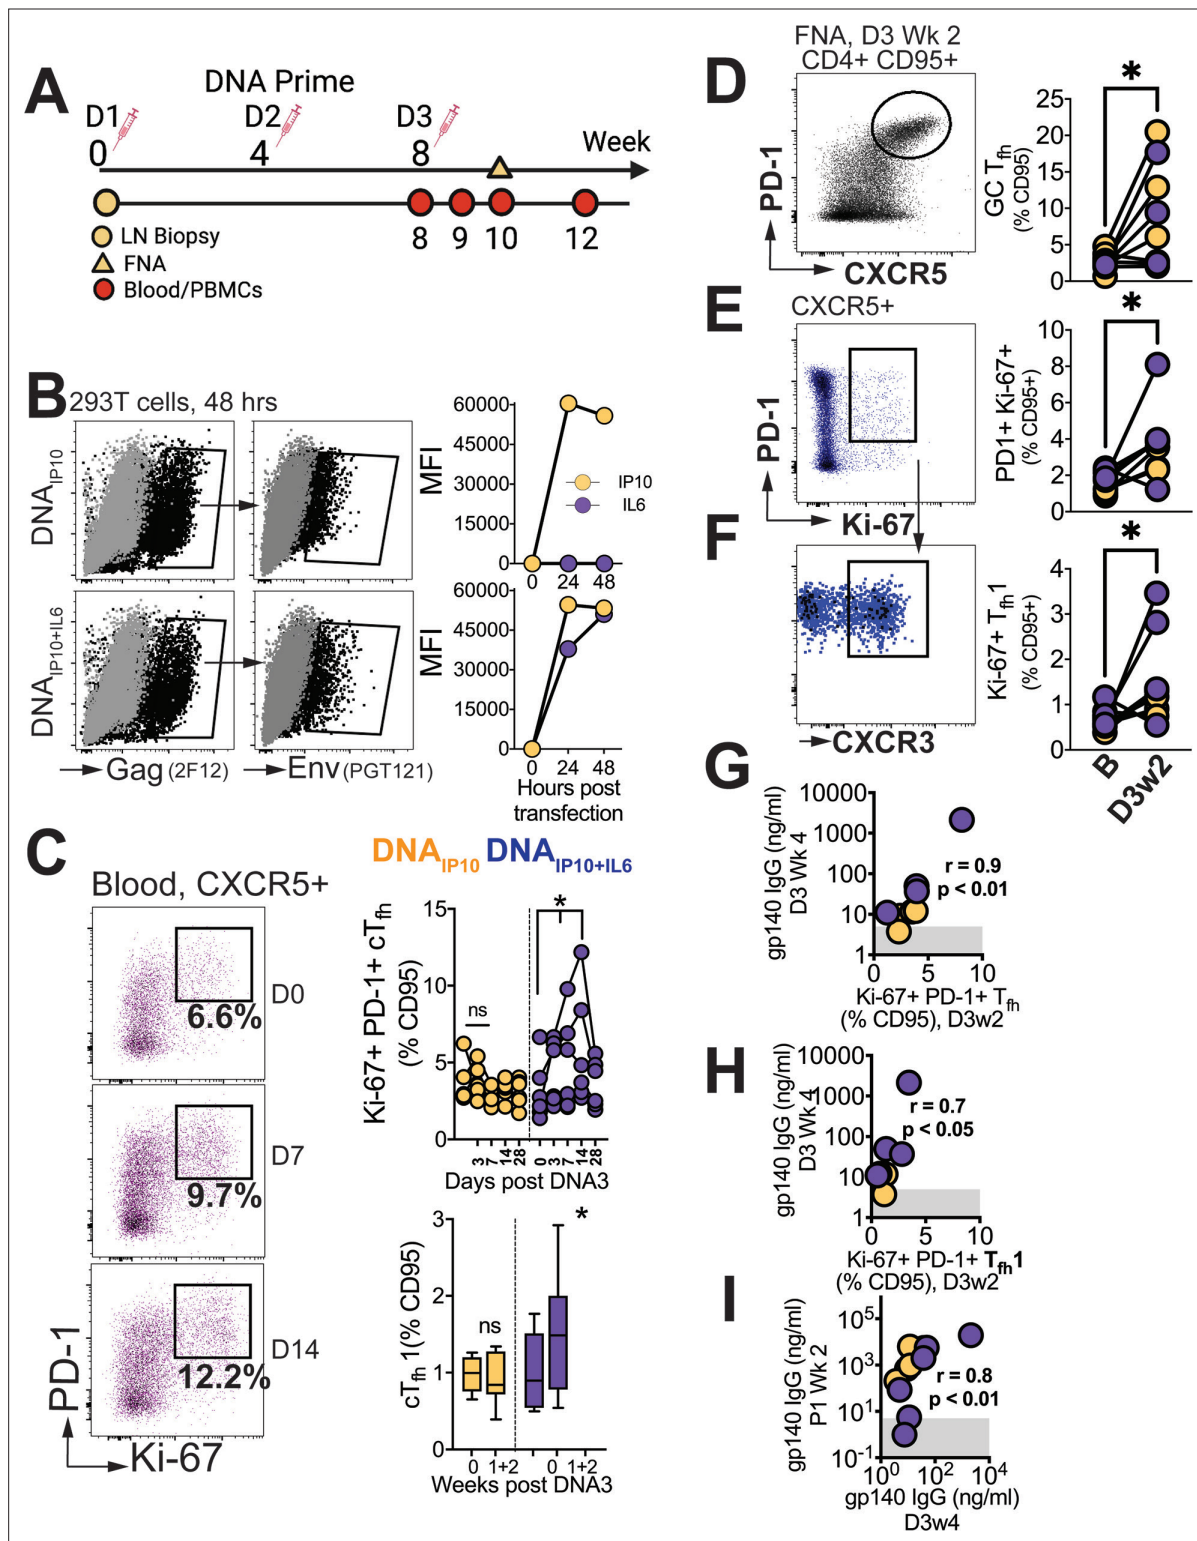

**Figure 7.** Differentiation of GC T<sub>fh</sub> Subsets initiated during the DNA priming phase. **(A)** Experimental design of DNA immunization phase; FNA, lymph node fine needle aspirates. **(B)** Intracellular expression of Gag (2F12), surface expression of HIV-1 Env (PGT121) and IP10 and IL6 in supernatants of transfected 293T cells. **(C)** Flow cytometry plots show activated (PD-1<sup>+</sup>Ki-67<sup>+</sup>) cT<sub>fh</sub> cells, frequencies post DNA3 (right top); frequencies of cT<sub>fh</sub>1 cells (right bottom). **(D)** GC T<sub>fh</sub> cells, **(E)** Ki-67<sup>+</sup> PD-1<sup>+</sup> cells of CXCR5<sup>+</sup> subset in lymph node. **(F)** CXCR3<sup>+</sup> subset of Ki-67<sup>+</sup> PD-1<sup>+</sup> CXCR5<sup>+</sup> subset. **(G)** Ki-67<sup>+</sup> PD-1<sup>+</sup> T<sub>fh</sub> in LN correlate with gp140 IgG at week 4 post DNA3. **(H)** Ki-67<sup>+</sup> PD-1<sup>+</sup> T<sub>fh</sub> in LN correlate with gp140 IgG at week 4 post DNA. **(I)** gp140 IgG at week 2 post P1 correlates with gp140 IgG at week 4 post DNA3. Data points show individual animals. Statistical analysis was performed using one-tailed Wilcoxon matched-pairs signed rank test (in panels C-F), or Spearman rank correlation test (**G-I**); \* p < 0.05.



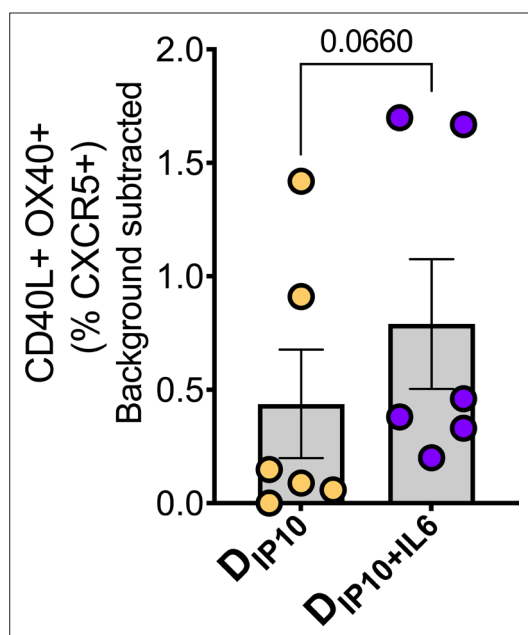

**Figure 7—figure supplement 1.** Frequencies of OX40<sup>+</sup>CD40L<sup>+</sup> cTfh cells stimulated ex vivo with Gag and Env.
